# Supplementary material
Source: publisher figshare collection journal article supplement (https://springernature.figshare.com/ndownloader/files/16234244)
Supplement: Supplementary file [file 16234244]

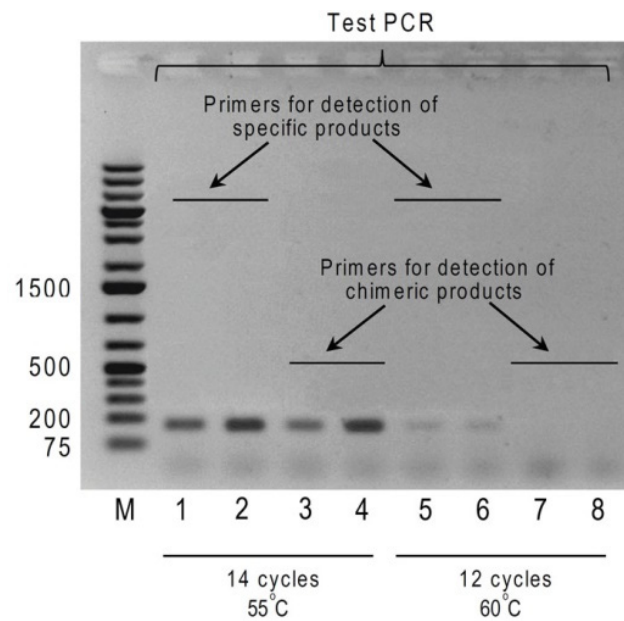

**Figure S1. Optimization of test PCR for detection of chimeric products synthesized during amplification of BC-ROI fragments from two-plasmid template.** Agarose gel electrophoresis analysis of test PCR products obtained at the indicated parameters using an equal molar mixture of plasmid#1 and plasmid#2 as template, and the following primers: BC1/ROI1 (lanes 1 and 5), BC2/ROI2 (lanes 2 and 6), BC1/ROI2 (lanes 3 and 7) and BC2/ROI1 (lanes 4 and 8). M stands for GeneRuler 1 kb Plus DNA Ladder (Thermo Fisher Scientific).
